# Supplementary material for: Ubiquitin-specific protease 22 is critical to in vivo angiogenesis, growth and metastasis of non-small cell lung cancer
Source: PubMed Central journal article supplement (PMC6916027; doi:10.1186/s12964-019-0480-x), 2019-12-16
Supplement: 12964_2019_480_MOESM1_ESM.pdf [file 12964_2019_480_MOESM1_ESM.pdf]

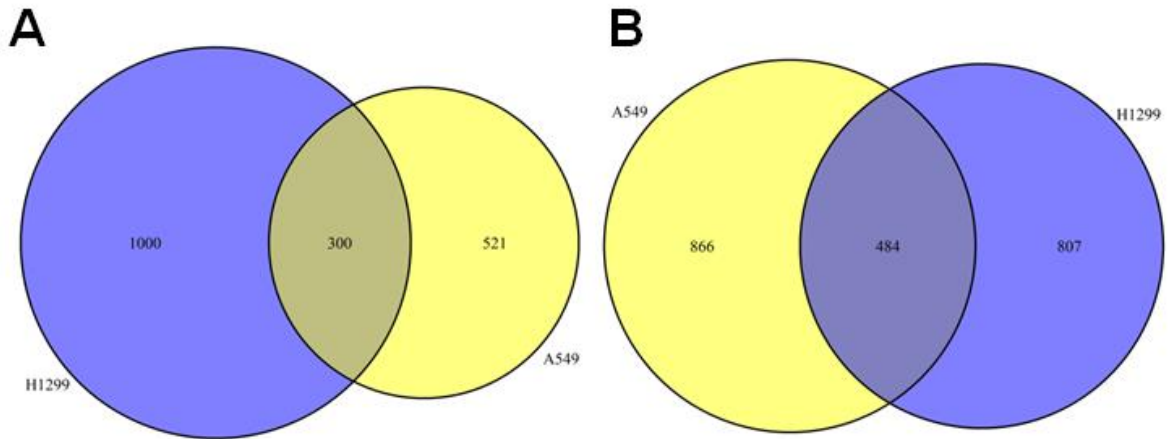

**Figure S1. Differentially expressed gene in USP22-Ko A549 and H1299 cells. A.** The up-regulated genes. **B.** The downregulated genes in two cells. Differentially expressed genes ( $\text{Log}_2 \text{FC} \geq 1$ ,  $P < 0.01$ ,  $\text{FDR} < 0.05$ ) in a cell are for these genes that are unanimously modulated in two USP22<sup>-/-</sup> clones.

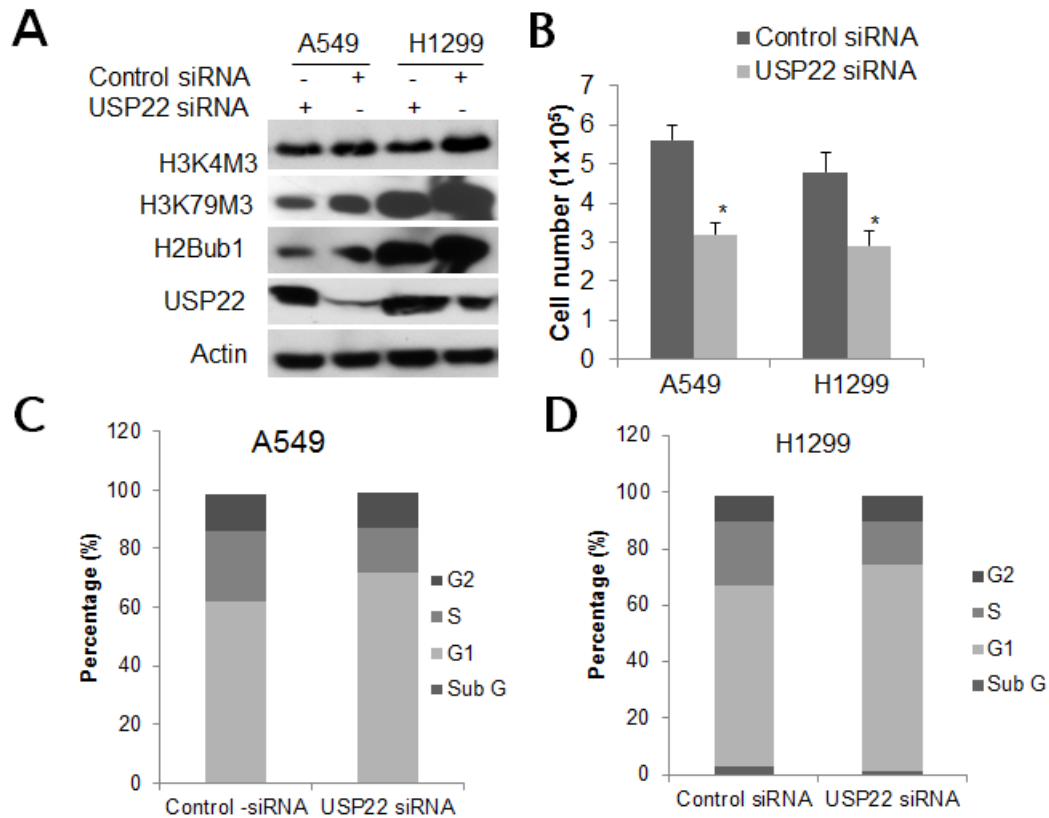

**Figure S2. Impact of knockdown of USP22 on H2Bub1/methylation of H3K4/K79, cancer cell proliferation, and cell cycle progression. A.** Western blot analysis of cell lysates of

A549 and H1299 cells transfected with either USP22 siRNA or scramble (control) siRNA at 72 h post transfection. **B.** Histogram of 72h proliferation ( $*P < 0.05$ , compared to control siRNA). Transient knockdown of USP22 induced cell cycle arrest in **C.** A549, and **D.** H460 cells. The histogram of cell cycle analysis shows the cell percentage in each phase of these cells transfected with control siRNA or USP22 siRNA.

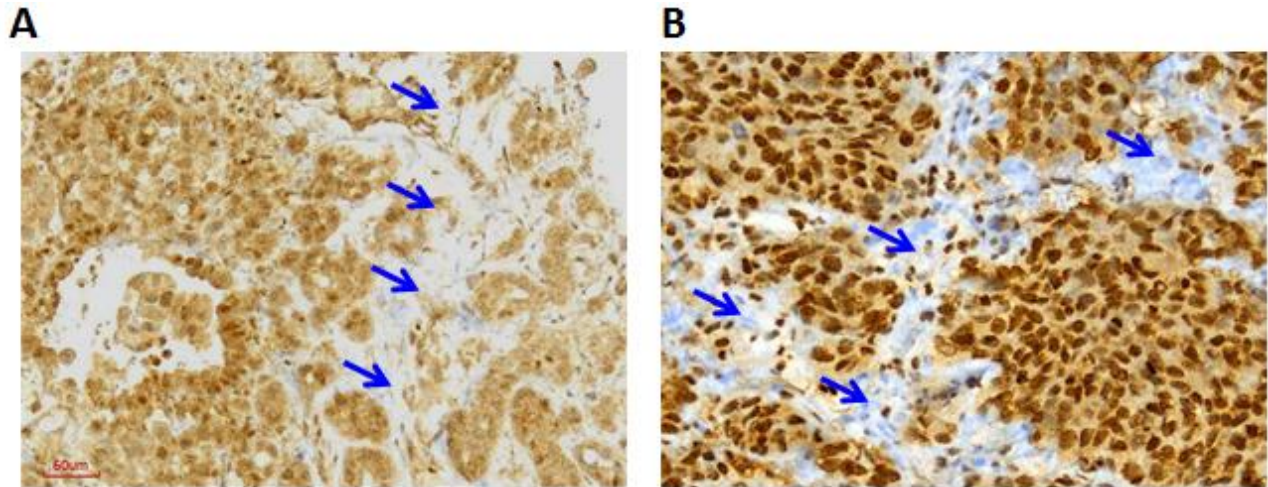

**Figure S3. Negative USP22 IHC stains in adjacent normal cells and tissues. A.** IHC staining of A549-USP22+/+ xenograft show specific nuclear staining of USP22 is present in cancer cells not in adjacent normal cells. **B.** IHC staining of H1299-USP22+/+ xenograft shows specific nuclear staining of USP22 is present in cancer cells not in normal fibroblast and lymphocyte cells (arrowed, magnification x200).

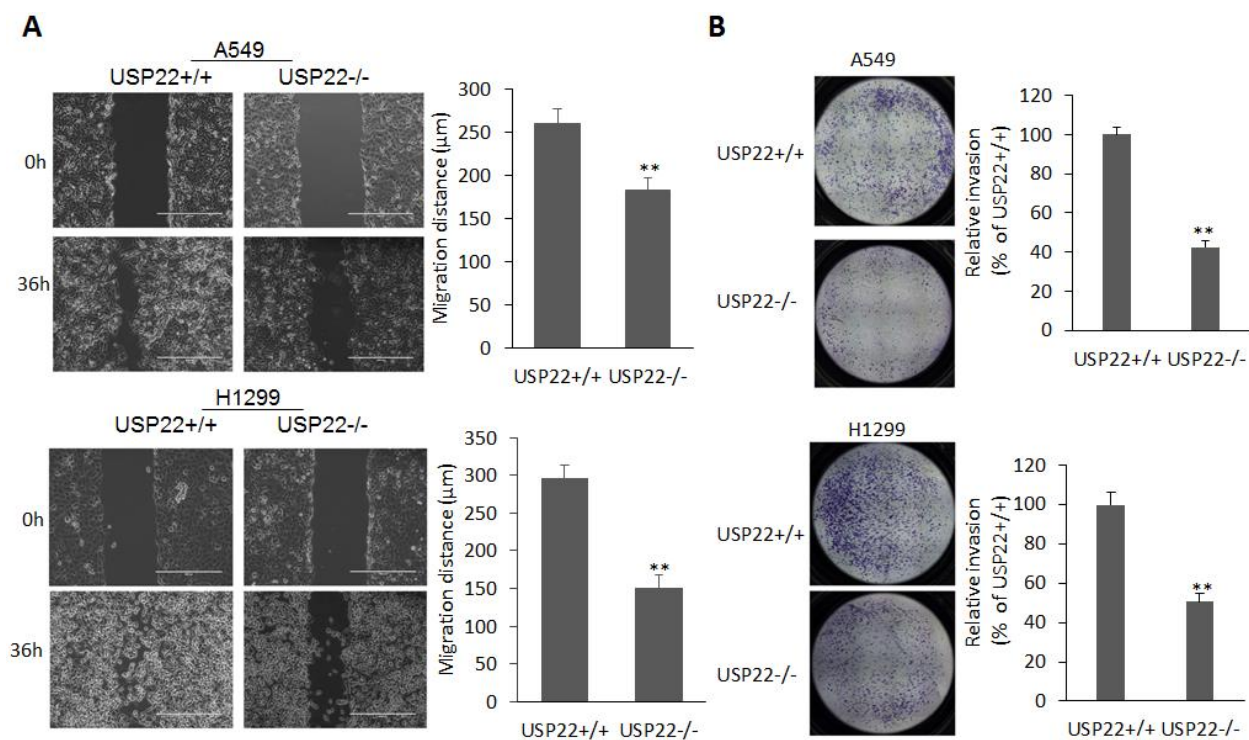

**Figure 4: Impact of knockout of USP22 on *in vitro* migration and invasion of A549 and H1299 cells.** **A.** Representative photomicrographs of the wound healing assay at 0h and 36h (left panel) and the quantitative analysis of migrating distance in the parental USP22+/+ and USP22-/- cells. **B.** Lower surfaces of Matrigel transwell of USP22+/+ and USP22-/- cancer cells (left panel) and the quantitative analysis of invaded cells after 24h culture (right panel). The invaded cell numbers are normalized to that of the parent USP22+/+ cells, and are presented as mean  $\pm$  SD values of two duplicates per cell type, \*\*P < 0.01, compared with the parent cells.

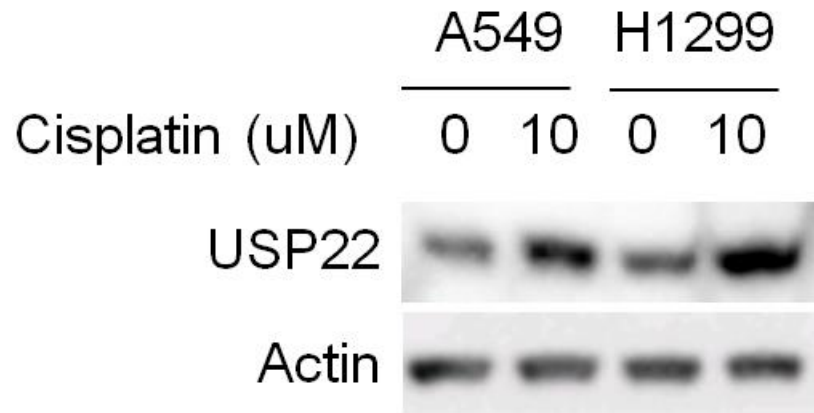

**Figure S5. Elevated USP22 in cancer cells survived cisplatin treatment.** Cell treated with 10 uM cisplatin for 72h, total protein extract from viable cells were collected for Western blot analysis.

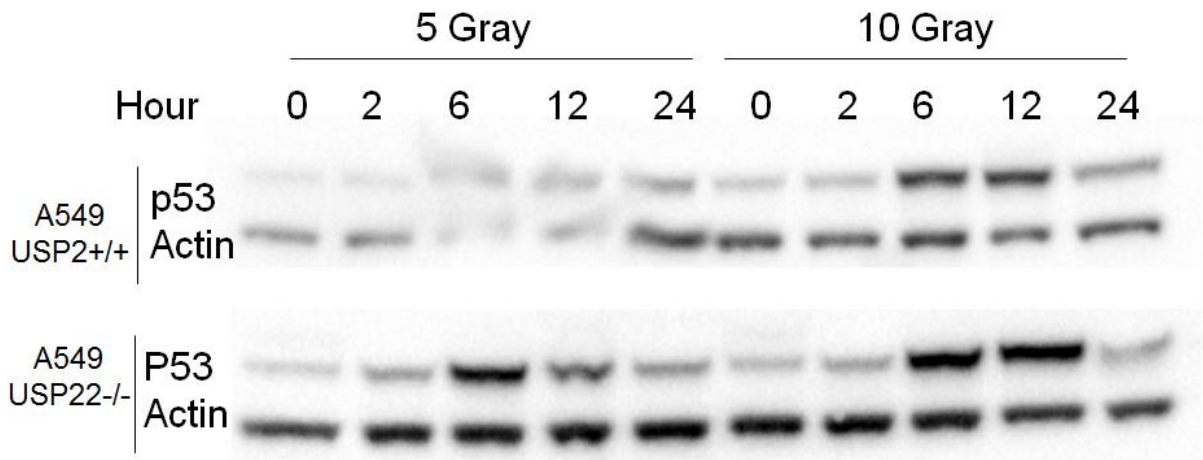

**Figure S6. Dynamics of P53 in A549 and USP22-Ko cells after 5 and 10 grays irradiation.** Protein was extracted at 2, 6, 12, 24 hours post-irradiation for Western Blot analysis. USP22 for A549-USP22<sup>-/-</sup> cells.
